# Supplementary material
Source: ML conference proceedings conference paper supplement (https://openaccess.thecvf.com/content/ICCV_2019/html/Qiao_Transductive_Episodic-Wise_Adaptive_ICCV_2019_paper.html)
Supplement: Supplementary file 1 [file Qiao_Transductive_Episodic-Wise_Adaptive_ICCV_2019_supplemental.pdf]

# Transductive Episodic-Wise Adaptive Metric for Few-Shot Learning

## SUPPLEMENTARY MATERIAL

### 1. The Proof for Lemma 1

**Lemma 1** Let  $\mathcal{X}, \mathcal{Y}$  be two symmetric and positive-definite matrices of the same size, then the function:

$$f(\mathcal{X}) = \text{tr}(\mathcal{X}\mathcal{Y}) - \log \det(\mathcal{X})$$

is minimized uniquely by:

$$\mathcal{X}^* = \mathcal{Y}^{-1}$$

*PROOF.* First of all, by introducing an auxiliary variable  $\mathcal{Z} = \mathcal{Y}^{\frac{1}{2}}\mathcal{X}\mathcal{Y}^{\frac{1}{2}}$  (note that  $\mathcal{Z}$  is symmetric and positive-definite iff  $\mathcal{X}$  is), and the conclusion  $\log \det(A) = \text{tr}(\log(A))$  which has been proved in [15], then we have:

$$\begin{aligned} f(\mathcal{X}) &= \text{tr}(\mathcal{X}\mathcal{Y}) - \log \det(\mathcal{X}) \\ &= \text{tr}(\mathcal{Y}^{-\frac{1}{2}}\mathcal{Z}\mathcal{Y}^{-\frac{1}{2}}\mathcal{Y}) - \log \det(\mathcal{Y}^{-\frac{1}{2}}\mathcal{Z}\mathcal{Y}^{-\frac{1}{2}}) \\ &= \text{tr}(\mathcal{Z}\mathcal{Y}^{-\frac{1}{2}}\mathcal{Y}\mathcal{Y}^{-\frac{1}{2}}) - \text{tr}(\log(\mathcal{Y}^{-\frac{1}{2}}\mathcal{Z}\mathcal{Y}^{-\frac{1}{2}})) \\ &= \text{tr}(\mathcal{Z}) - \text{tr}(\log(\mathcal{Z})) + \text{tr}(\log(\mathcal{Y})) \\ &= \text{tr}(\mathcal{Z}) - \log \det(\mathcal{Z}) + \log \det(\mathcal{Y}) \end{aligned} \tag{1}$$

According to Eq. (1), minimizing  $f(\mathcal{X})$  is equivalent to optimizing the following equations  $g(\mathcal{Z})$ :

$$g(\mathcal{Z}) = \text{tr}(\mathcal{Z}) - \log \det(\mathcal{Z}) \tag{2}$$

If  $\mathcal{Z}$  has eigenvalues  $\lambda_1, \lambda_2, \dots, \lambda_n$ , then we rewrite Eq. (2) as:

$$g(\mathcal{Z}) = \sum_{i=1}^n \lambda_i - \log \prod_{i=1}^n \lambda_i = \sum_{i=1}^n (\lambda_i - \log(\lambda_i))$$

Now  $h(\lambda) = \lambda - \log(\lambda)$  is minimized uniquely at  $\lambda = 1$ , so  $g(\mathcal{Z})$  is minimized uniquely when  $\mathcal{Z} = \mathcal{I}$ . Finally, combining this equation with  $\mathcal{Z} = \mathcal{Y}^{\frac{1}{2}}\mathcal{X}\mathcal{Y}^{\frac{1}{2}}$ , we thus have the solution as:  $\mathcal{X}^* = \mathcal{Y}^{-1}$

### 2. Detailed Experimental Results

In this section, we provide further experimental results over three few-shot benchmark datasets, the ablation study and more visualization in detail.

#### 2.1. Accuracy with 95% Confidence Interval

To verify the effectiveness of our approach for few-shot classification, we compare the TEAM framework with our re-implemented baseline (ProtoNet [12]) and many start-of-the-art methods in various setting on three benchmark datasets (*mini*-ImageNet, Cifar-100 and CUB). All results are shown in Table 1-3. Note that each accuracy is averaged over 1000 test tasks which are randomly selected from the testing set and reported with 95% confidence intervals for comparison.

#### 2.2. The performance with various training/testing shots.

In order to verify the nature of transduction [5, 6], where more training data are available, the less performance improvement will be, we further perform 5-way  $k$ -shot ( $k=1, 3, 5, 7, 9$ ) experiments on *mini*-ImageNet and all results are shown in Table. 5. As the number of shots increases, TEAM consistently outperforms our baseline with a large margin, but the performance improvement from TEAM decreases slightly, which further verifies the above analysis about transductive inference.

Table 1. Few-shot classification accuracy on *miniImageNet*. Tran: The different type of transduction. Top results are highlighted.

| Model            | Tran. | 5-Way 1-Shot        |                     | 5-Way 5-Shot        |                     |
|------------------|-------|---------------------|---------------------|---------------------|---------------------|
|                  |       | ConvNet             | ResNet              | ConvNet             | ResNet              |
| MatchNet [13]    | No    | 43.56 ± 0.84        | -                   | 55.31 ± 0.73        | -                   |
| MAML [2]         | BN    | 48.70 ± 1.84        | -                   | 63.10 ± 0.92        | -                   |
| MAML+ [6]        | Yes   | 50.83 ± 1.85        | -                   | 66.19 ± 1.85        | -                   |
| Reptile [8]      | BN    | 49.97 ± 0.32        | -                   | 65.99 ± 0.58        | -                   |
| ProtoNet [12]    | No    | 49.42 ± 0.78        | -                   | 68.20 ± 0.66        | -                   |
| GNN [3]          | No    | 50.33 ± 0.36        | -                   | 64.02 ± 0.51        | -                   |
| RelationNet [16] | BN    | 50.44 ± 0.82        | -                   | 65.32 ± 0.70        | -                   |
| PFA [10]         | No    | 54.53 ± 0.40        | 59.60 ± 0.41        | 67.87 ± 0.20        | 73.74 ± 0.19        |
| TADAM [9]        | No    | -                   | 58.50 ± 0.30        | -                   | <b>76.70 ± 0.30</b> |
| adaResNet [7]    | No    | -                   | 56.88               | -                   | 71.94               |
| LEO [11]         | No    | -                   | 60.06 ± 0.08        | -                   | 75.72 ± 0.12        |
| TPN [6]          | Yes   | 55.51 ± 0.86        | 59.46               | 69.86 ± 0.65        | 75.65               |
| Baseline (Ours)  | No    | 51.68 ± 0.31        | 55.25 ± 0.20        | 68.71 ± 0.20        | 70.58 ± 0.40        |
| TEAM (Ours)      | Yes   | <b>56.57 ± 0.21</b> | <b>60.07 ± 0.32</b> | <b>72.04 ± 0.12</b> | 75.90 ± 0.20        |

Table 2. Few-shot classification performance on Cifar-100. Tran: The different type of transduction. Top results are highlighted.

| Model           | Tran. | 5-Way 1-Shot        |                     | 5-Way 5-Shot        |                     |
|-----------------|-------|---------------------|---------------------|---------------------|---------------------|
|                 |       | ConvNet             | ResNet              | ConvNet             | ResNet              |
| MatchNet [13]   | No    | 50.53 ± 0.87        | -                   | 60.30 ± 0.82        | -                   |
| MAML [2]        | BN    | 49.28 ± 0.90        | -                   | 58.30 ± 0.80        | -                   |
| ProtoNet [12]   | No    | 56.66 ± 0.53        | -                   | 76.29 ± 0.14        | -                   |
| DEML [4]        | No    | -                   | 61.62 ± 1.01        | -                   | 77.94 ± 0.74        |
| Baseline (Ours) | No    | 57.83 ± 0.27        | 66.30 ± 0.40        | 76.40 ± 0.33        | 80.46 ± 0.27        |
| TEAM (Ours)     | Yes   | <b>64.07 ± 0.30</b> | <b>70.43 ± 0.24</b> | <b>79.05 ± 0.38</b> | <b>81.25 ± 0.22</b> |

Table 3. Few-shot classification performance on CUB. Tran: The different type of transduction. Top results are highlighted.

| Model            | Tran. | 5-Way 1-Shot        |                     | 5-Way 5-Shot        |                     |
|------------------|-------|---------------------|---------------------|---------------------|---------------------|
|                  |       | ConvNet             | ResNet              | ConvNet             | ResNet              |
| MatchNet [13]    | No    | 56.53 ± 0.99        | -                   | 63.54 ± 0.85        | -                   |
| MAML [2]         | BN    | 50.45 ± 0.97        | -                   | 59.60 ± 0.84        | -                   |
| ProtoNet [12]    | No    | 58.43 ± 0.30        | -                   | 75.22 ± 0.36        | -                   |
| RelationNet [16] | BN    | 62.45 ± 0.98        | -                   | 76.11 ± 0.69        | -                   |
| DEML [4]         | No    | -                   | 66.95 ± 1.06        | -                   | 77.11 ± 0.78        |
| TriNet [1]       | No    | -                   | 69.61 ± 0.46        | -                   | 84.10 ± 0.35        |
| Baseline (Ours)  | No    | 69.39 ± 0.20        | 74.55 ± 0.45        | 82.78 ± 0.24        | 85.98 ± 0.17        |
| TEAM (Ours)      | Yes   | <b>75.71 ± 0.18</b> | <b>80.16 ± 0.48</b> | <b>86.04 ± 0.14</b> | <b>87.17 ± 0.45</b> |

Table 4. Few-shot classification performance for ablation study. Proto (Ours): the baseline. TEAM<sup>‡</sup>: baseline+*TIM*. TEAM<sup>†</sup>: baseline+*TIM*+*EAM*. TEAM: baseline+*TIM*+*EAM*+*Bi-SIM*.

| Model             | <i>miniImageNet</i> |                     | Cifar-100           |                     | CUB                 |                     |
|-------------------|---------------------|---------------------|---------------------|---------------------|---------------------|---------------------|
|                   | 1-shot              | 5-shot              | 1-shot              | 5-shot              | 1-shot              | 5-shot              |
| Proto [13]        | 49.42 ± 0.78        | 68.20 ± 0.66        | 56.66 ± 0.53        | 76.29 ± 0.14        | 58.43 ± 0.30        | 75.22 ± 0.36        |
| Proto (Ours)      | 51.68 ± 0.31        | 68.71 ± 0.20        | 57.83 ± 0.27        | 76.40 ± 0.33        | 69.39 ± 0.20        | 82.78 ± 0.24        |
| TEAM <sup>‡</sup> | 52.97 ± 0.21        | 70.45 ± 0.14        | 59.56 ± 0.42        | 77.65 ± 0.43        | 70.27 ± 0.24        | 84.68 ± 0.05        |
| TEAM <sup>†</sup> | 55.35 ± 0.25        | 71.59 ± 0.12        | 62.76 ± 0.41        | 78.80 ± 0.40        | 75.06 ± 0.25        | <b>86.06 ± 0.09</b> |
| TEAM              | <b>56.57 ± 0.21</b> | <b>72.04 ± 0.12</b> | <b>64.07 ± 0.30</b> | <b>79.05 ± 0.38</b> | <b>75.71 ± 0.18</b> | 86.04 ± 0.14        |

### 2.3. Sparsity Nature of Episodic-wise Adaptive Metric.

For the sake of illustration, we firstly exploit the classic LMNN algorithm [14] with all support and query samples to optimize an oracle metric, which ensures all examples in this task can be completely distinguished, see Fig. 2 (left). Then we scale all elements of the metric into region [0, 1] and reorganize all values with numerical descending order in Fig. 2 (right).

Table 5. 5-way performance with various training/testing shots.

| Methods         | 1-shot           | 3-shot           | 5-shot           | 7-shot           | 9-shot           |
|-----------------|------------------|------------------|------------------|------------------|------------------|
| Baseline (Ours) | $51.68 \pm 0.31$ | $63.87 \pm 0.26$ | $68.71 \pm 0.20$ | $71.28 \pm 0.15$ | $73.35 \pm 0.44$ |
| TEAM (Ours)     | $56.57 \pm 0.21$ | $67.64 \pm 0.21$ | $72.04 \pm 0.12$ | $73.47 \pm 0.16$ | $75.04 \pm 0.19$ |
| Accuracy (+)    | 4.89             | 3.77             | 3.33             | 2.19             | 1.69             |

Obviously, there is a large value gap between the diagonal elements and the off-diagonal elements. Moreover, we further visualize the heatmap of the oracle metric in Fig. 1 in great detail.

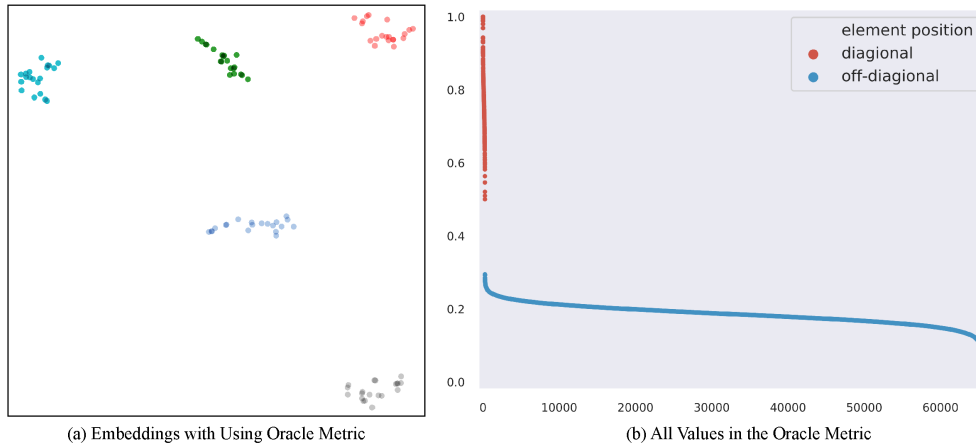

Figure 1. This figure illustrates the sparsity nature of the metric in few-shot learning. Left: The image embedding visualization using the oracle metric learned by LMNN. Right: The values distribution in different position of the matrix (sorted by descending order).

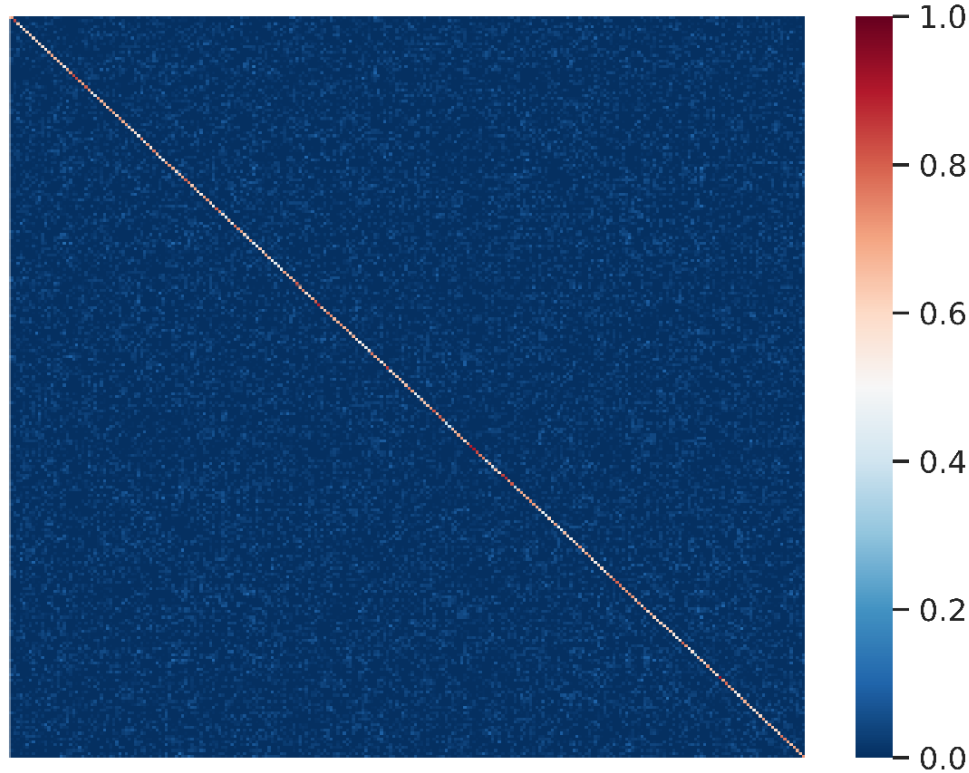

Figure 2. The heatmap of the oracle metric.

## References

- [1] Zitian Chen, Yanwei Fu, Yinda Zhang, Yu-Gang Jiang, Xiangyang Xue, and Leonid Sigal. Semantic feature augmentation in few-shot learning. *arXiv:1804.05298*, 2018.
- [2] Chelsea Finn, Pieter Abbeel, and Sergey Levine. Model-agnostic meta-learning for fast adaptation of deep networks. In *ICML*, 2017.
- [3] Victor Garcia and Joan Bruna. Few-shot learning with graph neural networks. In *ICLR*, 2017.
- [4] Bharath Hariharan and Ross B Girshick. Low-shot visual recognition by shrinking and hallucinating features. In *ICCV*, pages 3037–3046, 2017.
- [5] Thorsten Joachims. Transductive inference for text classification using support vector machines. In *ICML*, volume 99, pages 200–209, 1999.
- [6] Yanbin Liu, Juho Lee, Minseop Park, Saehoon Kim, Eunho Yang, Sung Ju Hwang, and Yi Yang. Learning to propagate labels: Transductive propagation network for few-shot learning. In *ICLR*, 2018.
- [7] Tsendsuren Munkhdalai, Xingdi Yuan, Soroush Mehri, and Adam Trischler. Rapid adaptation with conditionally shifted neurons. In *ICML*, pages 3661–3670, 2018.
- [8] Alex Nichol, Joshua Achiam, and John Schulman. On first-order meta-learning algorithms. *CoRR, abs/1803.02999*, 2, 2018.
- [9] Boris Oreshkin, Pau Rodríguez López, and Alexandre Lacoste. Tadam: Task dependent adaptive metric for improved few-shot learning. In *NIPS*, pages 719–729, 2018.
- [10] Siyuan Qiao, Chenxi Liu, Wei Shen, and Alan Yuille. Few-shot image recognition by predicting parameters from activations. In *CVPR*, volume 2, 2017.
- [11] Andrei A Rusu, Dushyant Rao, Jakub Sygnowski, Oriol Vinyals, Razvan Pascanu, Simon Osindero, and Raia Hadsell. Meta-learning with latent embedding optimization. In *ICLR*, 2019.
- [12] Jake Snell, Kevin Swersky, and Richard Zemel. Prototypical networks for few-shot learning. In *NIPS*, pages 4077–4087, 2017.
- [13] Oriol Vinyals, Charles Blundell, Tim Lillicrap, Daan Wierstra, et al. Matching networks for one shot learning. In *NIPS*, pages 3630–3638, 2016.
- [14] Kilian Q Weinberger, John Blitzer, and Lawrence K Saul. Distance metric learning for large margin nearest neighbor classification. In *NIPS*, pages 1473–1480, 2006.
- [15] Christopher S Withers and Saralees Nadarajah.  $\log \det a = \text{tr} \log a$ . *International Journal of Mathematical Education in Science and Technology*, 41(8):1121–1124, 2010.
- [16] Flood Sung, Yongxin Yang, Li Zhang, Tao Xiang, Philip HS Torr, and Timothy M Hospedales. Learning to compare: Relation network for few-shot learning. In *CVPR*, 2018.
